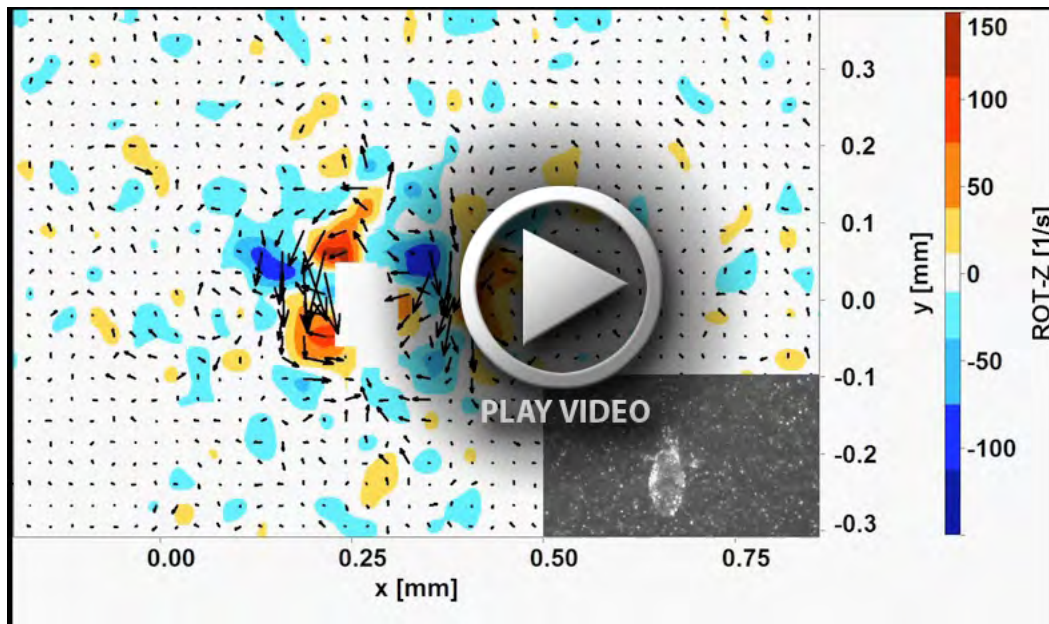

**Movie 1:** Flow fields around a jumping nauplius, same as in Fig. 2 ( $L = 0.24$  mm,  $T = 7.5$  ms,  $U = 33.7$  mm/s,  $\beta = 7.4$ ,  $Re = 7.7$ ). The panel shows the raw video.

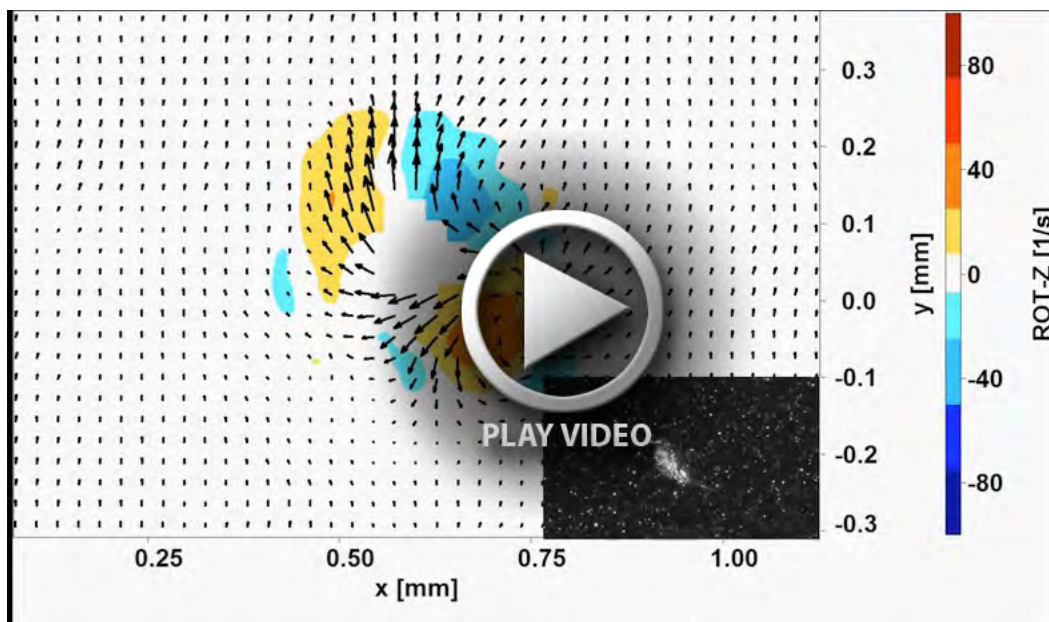

**Movie 2:** Flow fields around a jumping copepodid, same as in Fig. 3 ( $L = 0.33$  mm,  $T = 5$  ms,  $U = 61.1$  mm/s,  $\beta = 18.6$ ,  $Re = 19.1$ ). The panel shows the raw video.
